# Supplementary material
Source: PubMed Central journal article supplement (PMC3484962)
Supplement: 10.3163.1536-5050.100.4.014.sg001.pdf [file 10.3163.1536-5050.100.4.014.sg001.pdf]

**Innovation in evidence-based medicine education and assessment: an interactive class for third- and fourth-year medical students**

Jane P. Gagliardi, MD, MHS; Sandra S. Stinnett, DrPH; Connie Schardt, MLS, AHIP, FMLA

**APPENDIX**

**Evidence-based medicine course self-assessment**

This is the required pre-course self-assessment. The first 5 questions report your confidence in and experience with evidence-based medicine (EBM). The remaining 15 questions test your skill level. The test results will be reported anonymously. It should take less than an hour to complete the assessment. Thank you.

1. Please indicate the level of confidence you have for the following activities:

|                                                                                                          | Not confident         | Somewhat confident    | Reasonably confident  | Very confident        | Extremely confident   |
|----------------------------------------------------------------------------------------------------------|-----------------------|-----------------------|-----------------------|-----------------------|-----------------------|
| Formulate a patient-focused clinical question                                                            | <input type="radio"/> |
| Quickly find a relevant article that addresses a clinical question through a literature search on PubMed | <input type="radio"/> |
| Critically assess a journal article for possible sources of bias                                         | <input type="radio"/> |
| Assess the results of a therapy article                                                                  | <input type="radio"/> |
| Calculate absolute risk reduction, relative risk reduction, and number needed to treat                   | <input type="radio"/> |
| Use a likelihood ratio                                                                                   | <input type="radio"/> |
| Apply the results of studies to my patient care                                                          | <input type="radio"/> |

2. In the clinical setting, have you *observed* the practice of EBM (searching the literature, evaluating articles, and applying results to patients)?

- Never
- Once or twice
- Many times
- Regular activity

3. In the clinical setting, have you *participated* in the practice of EBM (searching the literature, evaluating articles, and applying results to patients)?

- Never
- Once or twice
- Many times
- Regular activity

4. How have information and training on the steps of EBM been provided to you? Check all that apply.

- Faculty lectures in class
- Library sessions
- Online tutorials
- Housestaff on rotations
- Attendings on rotations
- Clinical core sessions
- Research mentors
- Peers
- Self-study
- Other

Other (please specify) \_\_\_\_\_

5. Indicate your agreement with the following statements:

|                                                                          | Strongly disagree     | Somewhat disagree     | Neutral               | Somewhat agree        | Strongly agree        |
|--------------------------------------------------------------------------|-----------------------|-----------------------|-----------------------|-----------------------|-----------------------|
| EBM is time consuming and cannot be done during day-to-day patient care. | <input type="radio"/> |
| EBM is "cookbook medicine."                                              | <input type="radio"/> |
| EBM relies too much on statistics.                                       | <input type="radio"/> |
